# Supplementary material for: An explicit test of Pleistocene survival in peripheral versus nunatak refugia in two high mountain plant species
Source: PubMed Central journal article supplement (PMC7003806; doi:10.1111/mec.15316), 2019-12-12

## Supplemental Information for:

### **An explicit test of Pleistocene survival in peripheral versus nunatak refugia in two high mountain plant species**

Da Pan, Karl Hülber, Wolfgang Willner, Gerald M. Schneeweiss

#### **Table of Contents:**

|                                                                                                                                                        |    |
|--------------------------------------------------------------------------------------------------------------------------------------------------------|----|
| Table S1: Summary statistics for each population .....                                                                                                 | 2  |
| Table S2: Pairwise $F_{ST}$ values .....                                                                                                               | 3  |
| Table S3: Comparison of Pleistocene survival scenarios using two individuals per population .....                                                      | 4  |
| Figure S1: Plots of Delta $K$ and of mean $\text{Log}_e(X K)$ for each $K$ value .....                                                                 | 5  |
| Figure S2: Genetic structure ( $K=2$ ) estimated using STRUCTURE .....                                                                                 | 6  |
| Figure S3: Neighbor-Net .....                                                                                                                          | 7  |
| Figure S4: Scatter-plots of the first two components of a PCA .....                                                                                    | 8  |
| Figure S5: Change in Root Mean Square Error (RMSE) with increasing number of Partial Least Squares (PLS) components for the most supported model ..... | 9  |
| Figure S6: Prior and posterior distributions of parameter estimates .....                                                                              | 10 |
| Figure S7: Distribution of posterior quantiles of parameters .....                                                                                     | 11 |

Table S1 Summary statistics for each population of *Pedicularis asplenifolia* and *Carex fuliginosa* based on SNP data.

|                               | pop <sup>1</sup> | Summary statistics <sup>2</sup> |           |        |        |        |             |
|-------------------------------|------------------|---------------------------------|-----------|--------|--------|--------|-------------|
|                               |                  | $H_{obs}$                       | $H_{exp}$ | $H$    | $\pi$  | $K$    | $A_p$       |
| <b><i>P. asplenifolia</i></b> | 83               | 0.2368                          | 0.1708    | 0.1951 | 0.1952 | 1.4622 | 52.4 / 15.6 |
|                               | 107              | 0.1965                          | 0.1366    | 0.1561 | 0.1562 | 1.3725 | 29.5 / 13.7 |
|                               | 66               | 0.2223                          | 0.1484    | 0.1696 | 0.1696 | 1.3986 | 8.2 / 2.1   |
|                               | 113              | 0.1833                          | 0.1220    | 0.1394 | 0.1395 | 1.3308 | 2.6 / 0     |
|                               | 286              | 0.1536                          | 0.0958    | 0.1094 | 0.1095 | 1.2485 | 11.6 / 3.3  |
|                               | 285              | 0.1658                          | 0.1038    | 0.1186 | 0.1186 | 1.2901 | 7.6 / 1.5   |
|                               | 287              | 0.1844                          | 0.1138    | 0.1301 | 0.1301 | 1.3103 | 6.8 / 5.5   |
| <b><i>C. fuliginosa</i></b>   | 279              | 0.1577                          | 0.1196    | 0.1328 | 0.1329 | 1.3660 | 15.7 / 6.3  |
|                               | 82               | 0.1550                          | 0.1030    | 0.1145 | 0.1145 | 1.3105 | 22.1 / 20.9 |
|                               | 362              | 0.1372                          | 0.0814    | 0.0930 | 0.0930 | 1.2071 | 12.3 / 12.3 |
|                               | 284              | 0.1432                          | 0.0862    | 0.0984 | 0.0985 | 1.2506 | 75.9 / 66.0 |
|                               | 71               | 0.1624                          | 0.1044    | 0.1160 | 0.1160 | 1.3181 | 3.7 / 3.7   |
|                               | 114              | 0.1536                          | 0.0911    | 0.1041 | 0.1041 | 1.2469 | 9.6 / 6.8   |
|                               | 283              | 0.1513                          | 0.1073    | 0.1191 | 0.1192 | 1.3193 | 1.2 / 1.2   |
|                               | 282              | 0.1596                          | 0.1145    | 0.1271 | 0.1272 | 1.3439 | 1.1 / 1.1   |
|                               | 280              | 0.1536                          | 0.0909    | 0.1038 | 0.1038 | 1.2578 | 5.5 / 4.1   |
|                               | 281              | 0.1418                          | 0.0929    | 0.1031 | 0.1032 | 1.2642 | 11.1 / 8.3  |

<sup>1</sup> population (pop) numbers correspond to voucher numbers in Table 1

<sup>2</sup>  $H_{obs}$  = mean observed heterozygosity;  $H_{exp}$  = mean expected heterozygosity;  $H$  = mean heterozygosity over loci for each population;  $\pi$  = Nucleotide diversity.  $K$  = mean number of alleles over loci for each population;  $A_p$  = number of private alleles, given as nearly fixed (i.e., present in at least 75% of the individuals) / fixed (i.e., present in all individuals), corrected by nucleotide diversity as described in Westergaard *et al.* (2019).

Table S2 Pairwise  $F_{ST}$  values for *Pedicularis asplenifolia* and *Carex fuliginosa* based on SNP data.

***Pedicularis asplenifolia***

| pop <sup>1</sup> | 83    | 107   | 66    | 113   | 286   | 285   |
|------------------|-------|-------|-------|-------|-------|-------|
| 107              | 0.210 |       |       |       |       |       |
| 66               | 0.166 | 0.200 |       |       |       |       |
| 113              | 0.199 | 0.254 | 0.008 |       |       |       |
| 286              | 0.286 | 0.332 | 0.106 | 0.099 |       |       |
| 285              | 0.278 | 0.310 | 0.109 | 0.094 | 0.012 |       |
| 287              | 0.246 | 0.301 | 0.080 | 0.061 | 0.116 | 0.104 |

***Carex fuliginosa***

| pop <sup>1</sup> | 279   | 82    | 362   | 284   | 71    | 114   | 283   | 282   | 280   |
|------------------|-------|-------|-------|-------|-------|-------|-------|-------|-------|
| 82               | 0.207 |       |       |       |       |       |       |       |       |
| 362              | 0.314 | 0.374 |       |       |       |       |       |       |       |
| 284              | 0.234 | 0.231 | 0.405 |       |       |       |       |       |       |
| 71               | 0.187 | 0.204 | 0.346 | 0.167 |       |       |       |       |       |
| 114              | 0.213 | 0.212 | 0.389 | 0.205 | 0.148 |       |       |       |       |
| 283              | 0.168 | 0.200 | 0.340 | 0.183 | 0.152 | 0.182 |       |       |       |
| 282              | 0.146 | 0.206 | 0.324 | 0.179 | 0.134 | 0.152 | 0.136 |       |       |
| 280              | 0.192 | 0.253 | 0.363 | 0.211 | 0.151 | 0.228 | 0.168 | 0.087 |       |
| 281              | 0.250 | 0.268 | 0.422 | 0.254 | 0.197 | 0.187 | 0.230 | 0.109 | 0.211 |

<sup>1</sup> population (pop) numbers correspond to voucher numbers in Table 1

Table S3 Comparison of Pleistocene survival scenarios of the study species using two individuals per population and one population less for *Carex fuliginosa*.

| Species                | Model <sup>1</sup>          | Marginal density        | Bayes factor <sup>2</sup> | P-value |
|------------------------|-----------------------------|-------------------------|---------------------------|---------|
| <i>P. asplenifolia</i> | Nun                         | $9.73 \times 10^{-20}$  | >100                      | <0.001  |
|                        | Peri <sub>East</sub> +Nun   | $1.07 \times 10^{-4}$   | 0                         | 0.987   |
|                        | Peri <sub>South</sub> +Nun  | $3.08 \times 10^{-8}$   | >100                      | 0.002   |
|                        | Peri+Nun <sub>Central</sub> | $2.63 \times 10^{-13}$  | >100                      | <0.001  |
|                        | Peri <sub>East</sub>        | $1.11 \times 10^{-6}$   | 96.39                     | 0.031   |
|                        | Peri <sub>South</sub>       | $7.48 \times 10^{-6}$   | 14.30                     | 0.065   |
| <i>C. fuliginosa</i>   | Nun                         | $4.28 \times 10^{-98}$  | >100                      | <0.001  |
|                        | Peri <sub>East</sub> +Nun   | $2.78 \times 10^{-5}$   | 1.97                      | 0.112   |
|                        | Peri <sub>South</sub> +Nun  | $5.79 \times 10^{-7}$   | 94.65                     | 0.034   |
|                        | Peri+Nun <sub>Central</sub> | $6.85 \times 10^{-115}$ | >100                      | <0.001  |
|                        | Peri <sub>East</sub>        | $5.48 \times 10^{-5}$   | 0                         | 0.486   |
|                        | Peri <sub>South</sub>       | $7.84 \times 10^{-7}$   | 69.89                     | 0.023   |

<sup>1</sup> Nun, nunatak survival in interior refugia, the index indicating (where necessary) the location of the ancestral population (Central, central Alps); Peri, peripheral survival in peripheral refugia, the index indicating (where necessary) the location of the ancestral population (East, eastern Alps; South, southern Alps).

<sup>2</sup> the ratio between marginal densities of the best model (i.e., the one with the highest marginal density) and of the alternative model: the higher the value, the higher the support for the best model.

Fig. S1 Plots of (A, C) Delta  $K$  and of (B, D) mean  $\text{Log}_e(X|K)$  for each  $K$  value for (A, B) *P. asplenifolia* and for (C, D) *C. fuliginosa*.

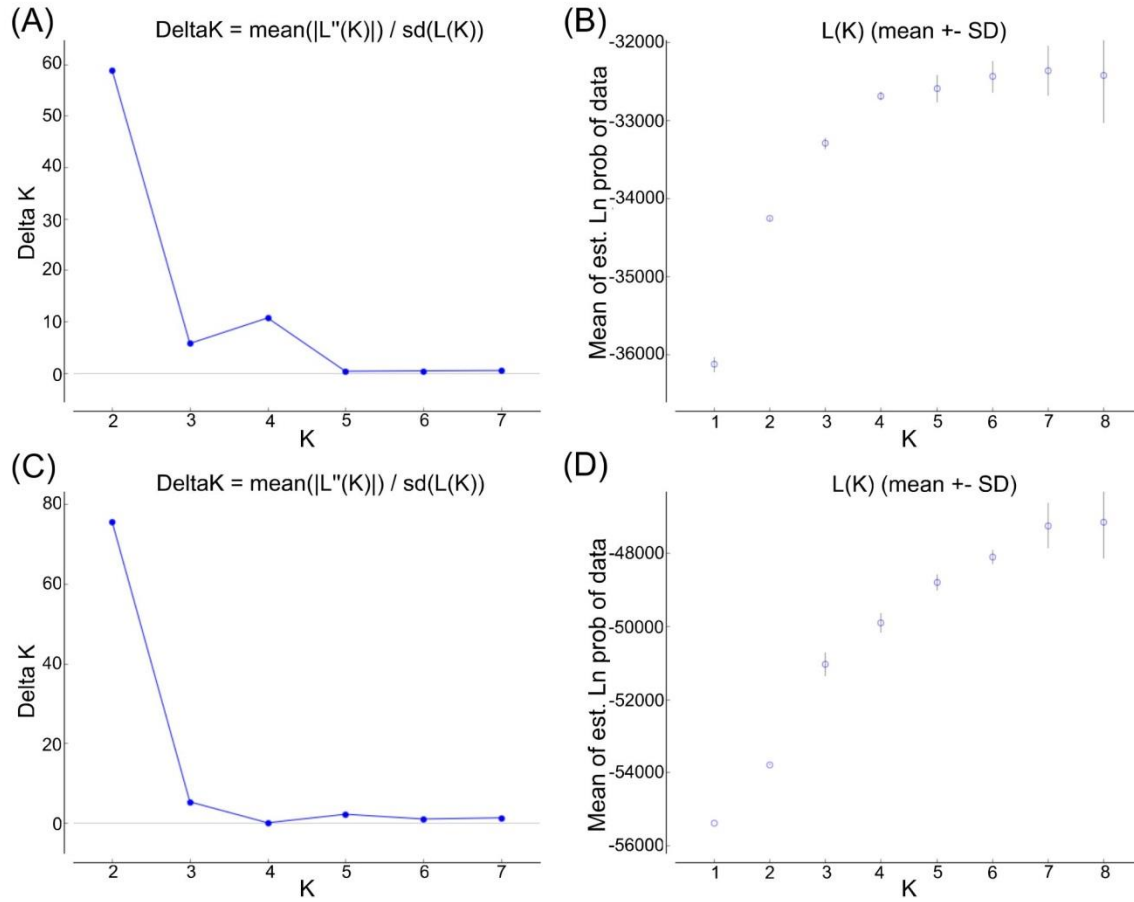

Fig. S2 Genetic structure ( $K=2$ ) of (A) *Pedicularis asplenifolia* and (B) *Carex fuliginosa* estimated using STRUCTURE. Each column corresponds to one individual. Population numbers correspond to voucher numbers in Table 1.

(A)

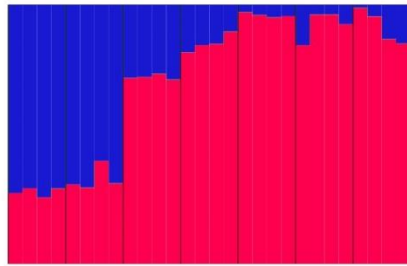

83 107 66 113 286 285 287

(B)

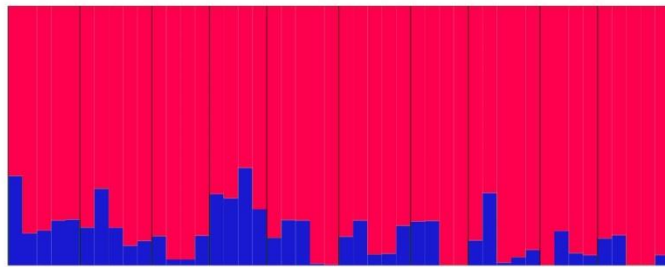

279 82 362 284 71 114 283 282 280 281

Fig. S3 Neighbor-Net for (A) *P. asplenifolia* and (B) *C. fuliginosa*. Population numbers correspond to voucher numbers in Table 1.

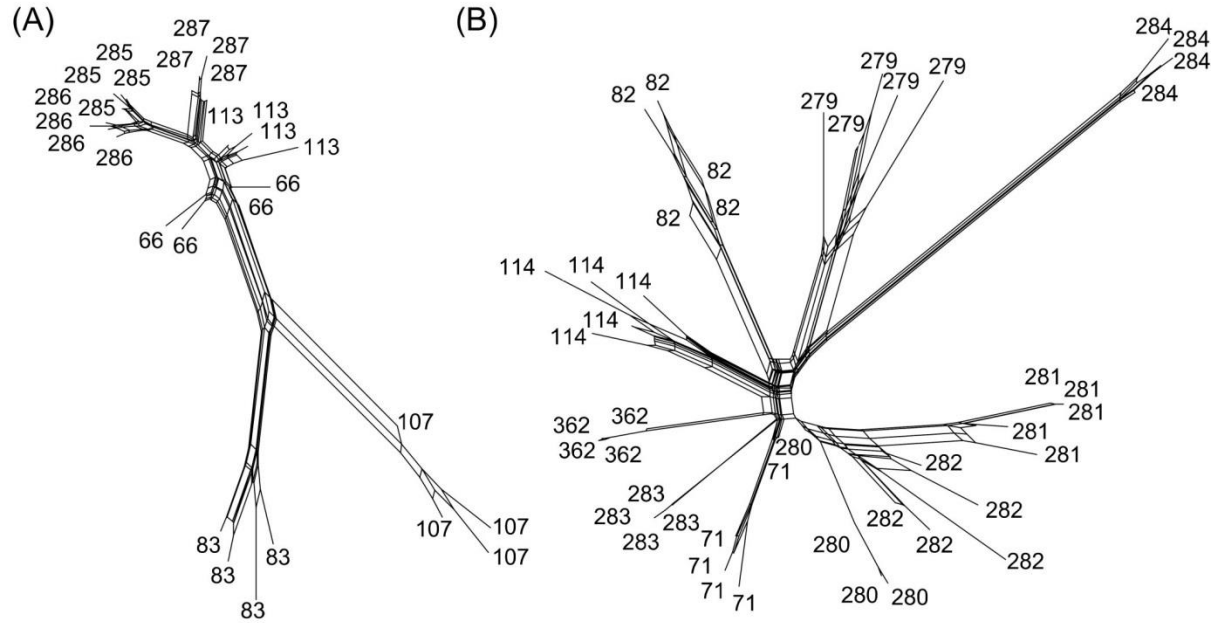

Fig. S4 Scatter-plots of the first two components of a principal component analysis (PCA) for (A) *P. asplenifolia* and (B) *C. fuliginosa* based on SNP data. Population numbers correspond to voucher numbers in Table 1.

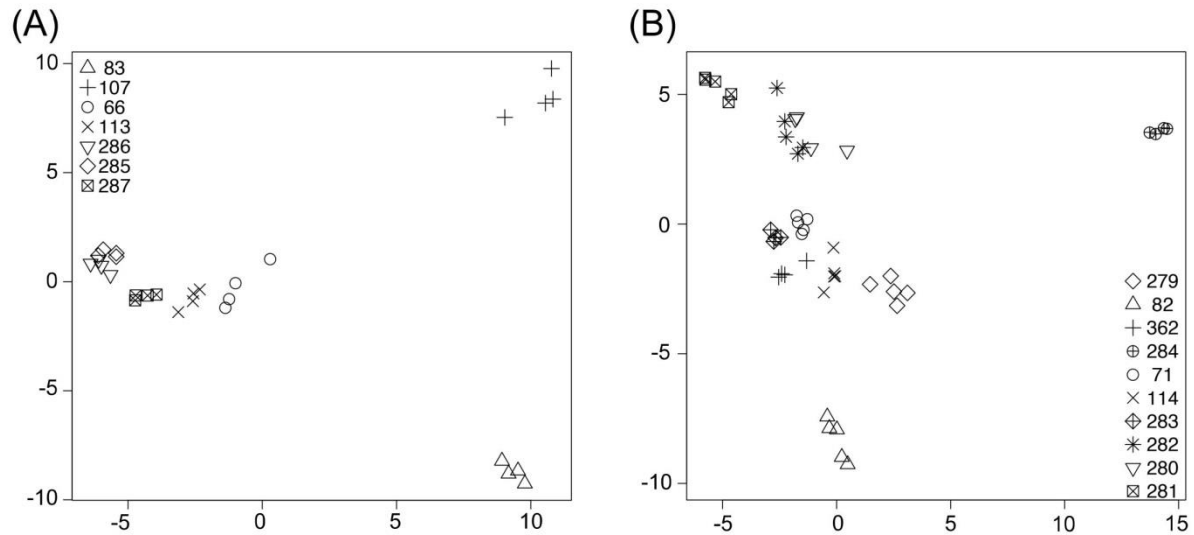



Fig. S5 Change in Root Mean Square Error (RMSE) with increasing number of Partial Least Squares (PLS) components for the most supported model in (A) *Pedicularis asplenifolia* (peripheral plus nunatak survival model with the ancestral population located in the eastern Alps) and (B) *Carex fuliginosa* (peripheral survival only model with the ancestral population located in the eastern Alps).  $N_{anc}$  = population size of the ancestral population;  $k$  = maximum carrying capacity;  $m$  = migration rate.

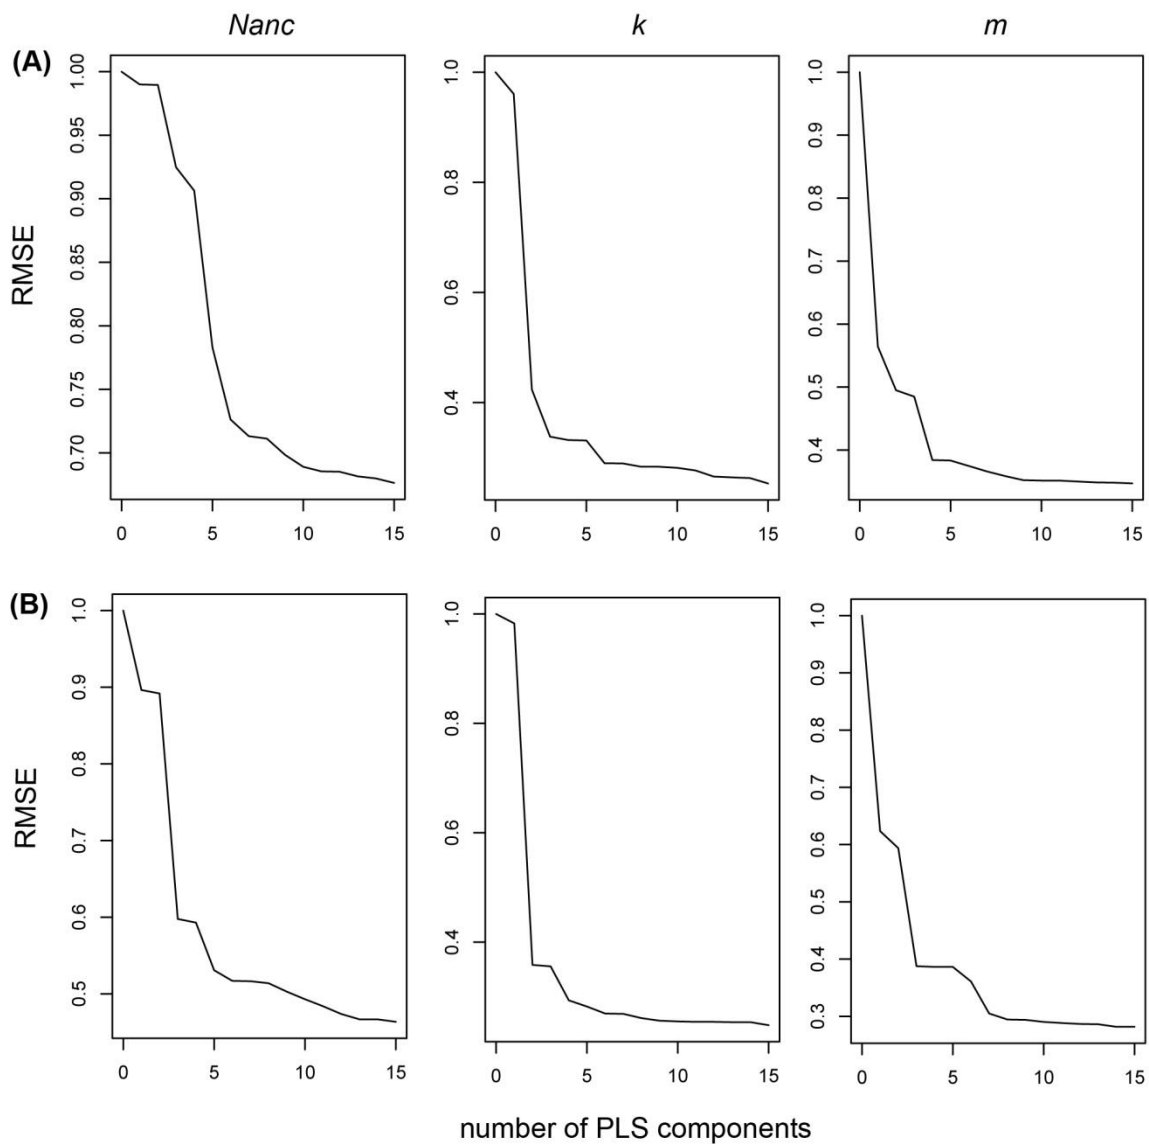

Fig. S6 Prior distributions (black line) and posterior distributions (grey line) of parameter estimates in (A) *Pedicularis asplenifolia* (peripheral plus nunatak survival model with the ancestral population located in the eastern Alps: Peri<sub>East+Nun</sub>) and (B) *Carex fuliginosa* (peripheral survival only model with the ancestral population located in the eastern Alps: Peri<sub>East</sub>).  $N_{anc}$  = population size of the ancestral population;  $k$  = maximum carrying capacity;  $m$  = migration rate.

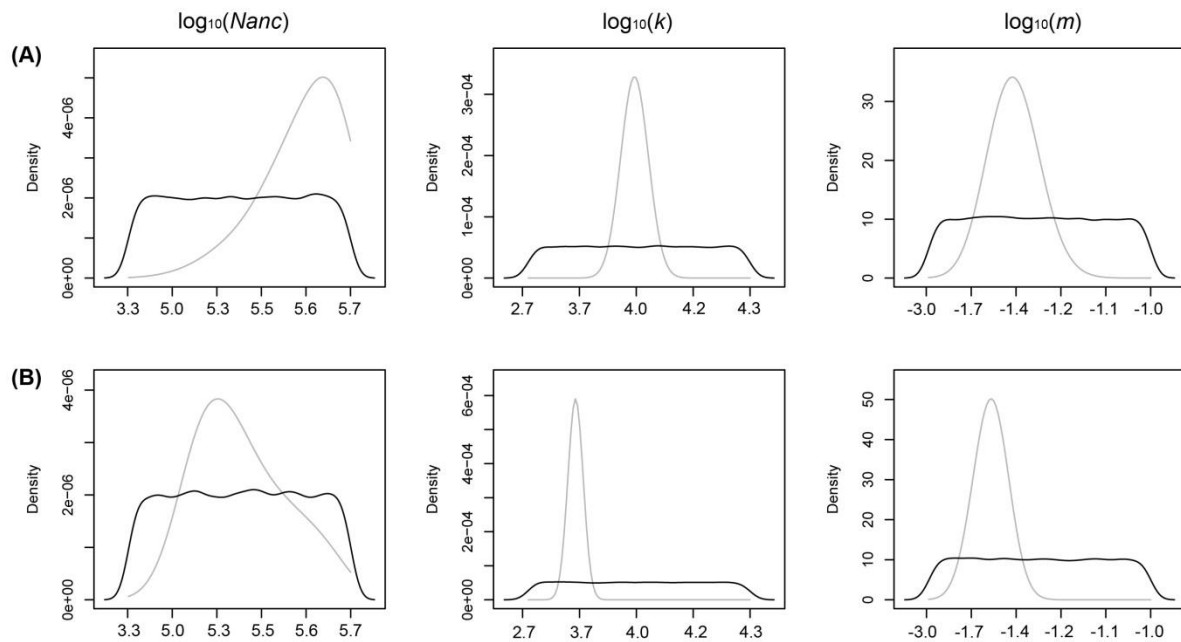

Fig. S7 Distribution of posterior quantiles of parameters for (A) *Pedicularis asplenifolia* (peripheral plus nunatak survival model with the ancestral population located in the eastern Alps: Peri<sub>East+Nun</sub>) and (B) *Carex fuliginosa* (peripheral survival only model with the ancestral population located in the eastern Alps: Peri<sub>East</sub>). Departures from a uniform distribution were tested with a Kolmogorov-Smirnov test ( $p$ -values  $<0.001$  in all six tests).  $N_{anc}$  = population size of the ancestral population;  $k$  = maximum carrying capacity;  $m$  = migration rate.

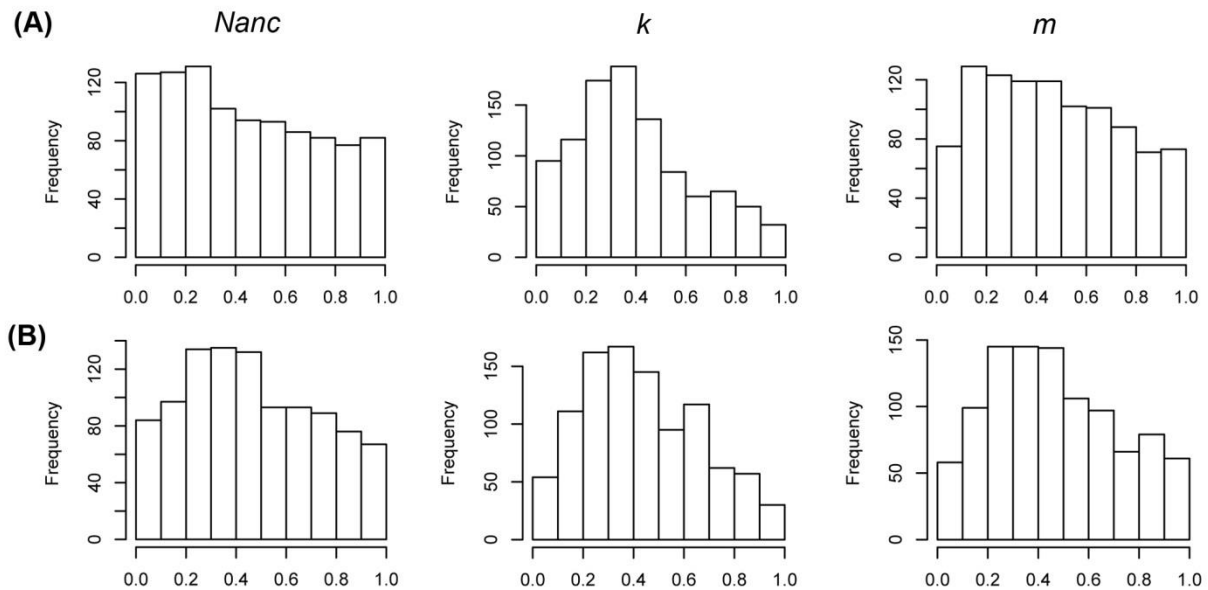

Supplement: MEC-29-172-s001.pdf [file MEC-29-172-s001.pdf]
